# Supplementary material for: Randomized controlled trial of the effect of hyperinsulinemic normoglycemia during liver resection on postoperative hepatic function and surgical site infection
Source: PubMed Central journal article supplement — Ann Transl Med. 2023 Mar 15;11(5):205. doi: 10.21037/atm-22-3721 (PMC10061465; doi:10.21037/atm-22-3721), 2023-03-15
Supplement: atm-11-05-205-dss.pdf [file atm-11-05-205-dss.pdf]

## Data Sharing Statement

|                     |                                                                                                                                                    |                                                                                                                |
|---------------------|----------------------------------------------------------------------------------------------------------------------------------------------------|----------------------------------------------------------------------------------------------------------------|
| <b>Article Info</b> | <a href="https://dx.doi.org/10.21037/atm-22-3721">https://dx.doi.org/10.21037/atm-22-3721</a>                                                      |                                                                                                                |
| <b>Item</b>         | <b>Question</b>                                                                                                                                    | <b>Authors' Response<br/>(place "-" if not applicable)</b>                                                     |
| 1                   | Would you like to share data collected for your study to others?                                                                                   | Yes.                                                                                                           |
| 2                   | If not, would you like to share the reason for your decision?                                                                                      | -                                                                                                              |
| 3                   | What data in particular will be shared?                                                                                                            | Schindl score and the incidence of surgical site infection rate.                                               |
| 4                   | Any other documents will be share? Such as study protocol, statistical analysis plan, informed consent form, clinical study report, analytic code. | No.                                                                                                            |
| 5                   | When will data availability begin?                                                                                                                 | Three months after the manuscript is accepted.                                                                 |
| 6                   | When will data availability end?                                                                                                                   | One year after manuscript is accepted.                                                                         |
| 7                   | To whom will you share the data?                                                                                                                   | Researchers who are willing to share data with us to carry out multicenter study.                              |
| 8                   | For what type of analysis or purpose?                                                                                                              | For multicenter study.                                                                                         |
| 9                   | How or where can the data/documents be obtained?                                                                                                   | Data can be obtained through the email: <a href="mailto:kohmiya@yamanashi.ac.jp">kohmiya@yamanashi.ac.jp</a> . |
| 10                  | Any other restrictions?                                                                                                                            | No.                                                                                                            |
